# Supplementary material
Source: PubMed Central journal article supplement (PMC2711270)
Supplement: mmc1.pdf [file mmc1.pdf]

Biophysical Journal, Volume 96

**Supporting Material**

**Calmodulin mediates the Ca<sup>2+</sup>-dependent regulation of Cx44 gap junctions**

Yubin Zhou, Wei Yang, Monica M. Lurtz, Yanyi Chen, Jie Jiang, Yun Huang, Charles F. Louis, and Jenny J. Yang

**Supplementary data**

**Calmodulin mediates the Ca<sup>2+</sup>-dependent regulation of Cx44 gap junctions**

**Running Title:** Connexin44 interacting with Ca<sup>2+</sup>-calmodulin

Yubin Zhou,<sup>\*</sup> Wei Yang,<sup>\*</sup> Monica M. Lurtz,<sup>†</sup> Yanyi Chen,<sup>\*</sup> Jie Jiang,<sup>\*</sup> Yun Huang,<sup>\*</sup> Charles F. Louis,<sup>†</sup> and Jenny J. Yang<sup>\*</sup>

<sup>\*</sup>Department of Chemistry, Georgia State University, Atlanta, GA 30303 USA; and the

<sup>†</sup>Department of Cell Biology and Neuroscience, University of California, 900 University Avenue, Riverside, CA 92521, USA

Address corresponding to:

Jenny J. Yang,

Department of Chemistry

Georgia State University

University Plaza, Atlanta, Georgia 30302 USA

Tel: 404-413-5520

Fax: 404-413-5551

Email: [chejyy@langate.gsu.edu](mailto:chejyy@langate.gsu.edu)

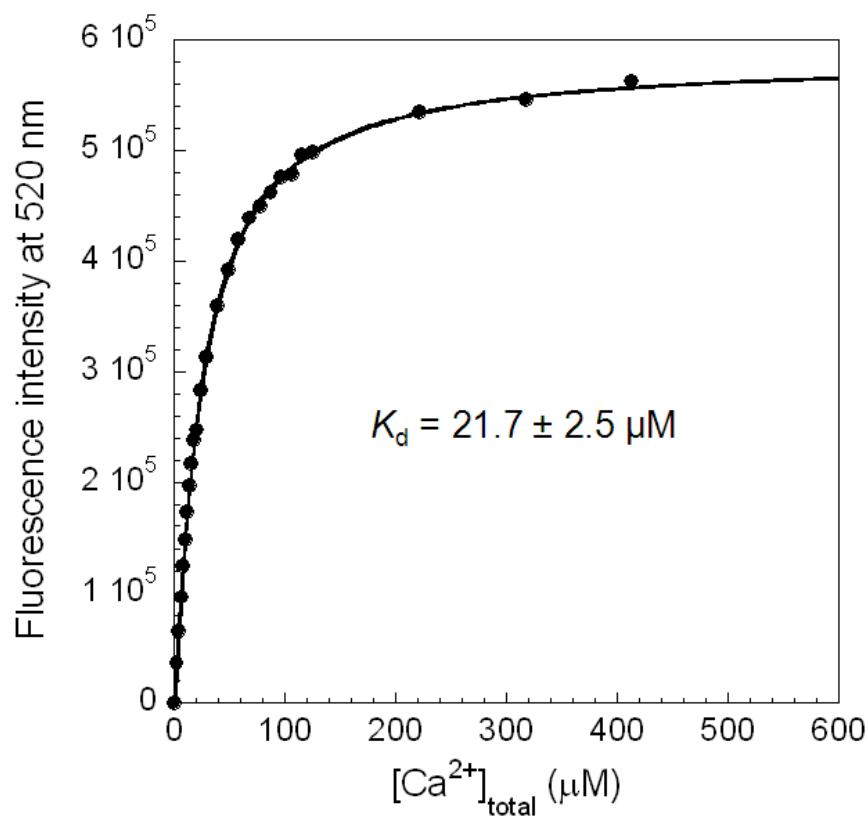

FIGURE S1 Ca<sup>2+</sup> titration of the Ca<sup>2+</sup>-indicator Oregon Green 488 BAPTA-5N. Fluorescence intensity at 520 nm was plotted as a function of total Ca<sup>2+</sup> concentration. A dissociation constant of 21.7 ± 2.5 μM was obtained by fitting the curve with a 1:1 binding process in 50 mM HEPES, 100 mM KCl, at pH 7.5. Ca<sup>2+</sup> concentration at each point during titration of CaM or CaM-peptide complexes was determined with the Ca<sup>2+</sup> dye Oregon Green 488 BAPTA-5N (0.2 μM; λ<sub>ex</sub> = 495 nm and λ<sub>em</sub> = 520 nm) using the equation:

$$[Ca^{2+}]_{free} = K_d \times \frac{F - F_{min}}{F_{max} - F}$$
